# Supplementary material
Source: Royal Society of Chemistry journal article supplement (doi:10.1039/d6cp01474g)
Supplement: d6cp01474g2.pdf [file d6cp01474g2.pdf]

## Interpretable Machine-Learning Prediction of DFT Energies per Atom and Identification of Magic Numbers in Coinage-Metal Nanoclusters ( $N \leq 55$ ) from the Open Quantum Cluster Database

Ali A Khairbek<sup>1\*</sup>, Maha I. Al-Zaben<sup>2</sup>, Abdullah Yahya Abdullah Alzahrani<sup>3</sup>, and Renjith Thomas<sup>4,5\*</sup>

<sup>1</sup> Department of Mechanical Engineering, University Centre for Research & Development, Chandigarh University, Gharuan, Mohali, Punjab, India

<sup>2</sup> Department of Chemistry, College of Science, King Saud University, P.O. Box 2455, Riyadh 11451, Saudi Arabia

<sup>3</sup> Department of Chemistry, Faculty of Science, King Khalid University, Abha, 61413, Saudi Arabia

<sup>4</sup> Department of Chemistry, St Berchmans College (Autonomous), Mahatma Gandhi University, Changanassery, Kerala, India-686101.

<sup>5</sup> Centre for Theoretical and Computational Chemistry, St Berchmans College (Autonomous), Changanassery, Kerala, India-686101.

Corresponding Author: **Prof. Renjith Thomas** [renjith@sbcollege.ac.in](mailto:renjith@sbcollege.ac.in), **Dr. Ali A Khairbek** [alikhairbek@gmail.com](mailto:alikhairbek@gmail.com)

### Contents

**S1.** Extended ML vs DFT comparison for all cluster sizes (Table S1)

**S2.** Per-model cross-validation results (Table S2)

**S3.** Per-metal model accuracy (Table S3)

**S4.** Full-feature SHAP importance ranking (Table S4)

**S5.** Geometry-only model: full benchmarking (Table S5)

**S6.** Per-metal magic-number tables with full  $\Delta^2E$  series (Tables S6–S8)

**S7.** Reproducibility checklist and code availability

### S1. Extended ML vs DFT Comparison for All Cluster Sizes

**Table S1.** Average DFT and ML-predicted energy per atom (eV/atom) and per-size mean absolute error (MAE) for all nuclearities  $N = 5-55$  in the test set. Values are recomputed with

the corrected pipeline (LightGBM, full feature set including cluster size N). The full numerical table is also provided as a supplementary CSV file.

| <b>N</b> | <b>n samples</b> | <b>Avg DFT (eV/atom)</b> | <b>Avg ML (eV/atom)</b> | <b>MAE (eV/atom)</b> |
|----------|------------------|--------------------------|-------------------------|----------------------|
| 5        | 7                | -1.5679                  | -1.5999                 | 0.0489               |
| 6        | 5                | -1.7123                  | -1.7877                 | 0.0754               |
| 7        | 11               | -1.9573                  | -1.9406                 | 0.0289               |
| 8        | 7                | -1.9774                  | -1.9812                 | 0.0172               |
| 9        | 14               | -2.1244                  | -2.1103                 | 0.0364               |
| 10       | 16               | -2.0869                  | -2.0837                 | 0.0275               |
| 11       | 8                | -2.1498                  | -2.1519                 | 0.0190               |
| 12       | 4                | -2.2664                  | -2.2538                 | 0.0168               |
| 13       | 16               | -2.1895                  | -2.1854                 | 0.0201               |
| 14       | 14               | -2.2028                  | -2.2081                 | 0.0198               |
| 15       | 13               | -2.3614                  | -2.3478                 | 0.0250               |
| 16       | 14               | -2.1890                  | -2.1940                 | 0.0168               |
| 17       | 14               | -2.2670                  | -2.2709                 | 0.0159               |
| 18       | 8                | -2.3789                  | -2.3792                 | 0.0173               |
| 19       | 10               | -2.3384                  | -2.3371                 | 0.0085               |
| 20       | 16               | -2.4695                  | -2.4603                 | 0.0182               |
| 21       | 13               | -2.4316                  | -2.4300                 | 0.0131               |
| 22       | 14               | -2.3853                  | -2.3888                 | 0.0176               |
| 23       | 19               | -2.3786                  | -2.3782                 | 0.0131               |
| 24       | 13               | -2.5367                  | -2.5440                 | 0.0218               |
| 25       | 20               | -2.4844                  | -2.4849                 | 0.0108               |
| 26       | 18               | -2.4841                  | -2.4975                 | 0.0204               |
| 27       | 6                | -2.3824                  | -2.3873                 | 0.0137               |
| 28       | 19               | -2.4329                  | -2.4386                 | 0.0118               |
| 29       | 6                | -2.3474                  | -2.3452                 | 0.0115               |

|    |    |         |         |        |
|----|----|---------|---------|--------|
| 30 | 17 | -2.5592 | -2.5585 | 0.0074 |
| 31 | 17 | -2.4458 | -2.4433 | 0.0142 |
| 32 | 17 | -2.4539 | -2.4561 | 0.0083 |
| 33 | 14 | -2.5465 | -2.5446 | 0.0107 |
| 34 | 18 | -2.4101 | -2.4079 | 0.0086 |
| 35 | 12 | -2.4563 | -2.4669 | 0.0138 |
| 36 | 12 | -2.4925 | -2.4920 | 0.0087 |
| 37 | 15 | -2.4700 | -2.4752 | 0.0092 |
| 38 | 10 | -2.5676 | -2.5735 | 0.0087 |
| 39 | 7  | -2.6921 | -2.6945 | 0.0115 |
| 40 | 15 | -2.5240 | -2.5249 | 0.0065 |
| 41 | 13 | -2.6661 | -2.6660 | 0.0096 |
| 42 | 17 | -2.4707 | -2.4695 | 0.0059 |
| 43 | 18 | -2.6220 | -2.6197 | 0.0075 |
| 44 | 16 | -2.6163 | -2.6183 | 0.0056 |
| 45 | 12 | -2.4586 | -2.4579 | 0.0103 |
| 46 | 20 | -2.6616 | -2.6666 | 0.0119 |
| 47 | 6  | -2.2569 | -2.2558 | 0.0088 |
| 48 | 11 | -2.6510 | -2.6486 | 0.0085 |
| 49 | 13 | -2.4115 | -2.4122 | 0.0095 |
| 50 | 14 | -2.6426 | -2.6441 | 0.0120 |
| 51 | 9  | -2.5750 | -2.5814 | 0.0084 |
| 52 | 17 | -2.5711 | -2.5705 | 0.0080 |
| 53 | 7  | -2.4509 | -2.4555 | 0.0124 |
| 54 | 14 | -2.4684 | -2.4730 | 0.0109 |
| 55 | 12 | -2.5444 | -2.5489 | 0.0116 |

**Notes:** (i) values are derived from the test partition of the LightGBM model trained on the full feature set; (ii) per-size sample counts vary because the 70/15/15 split is stratified by

metal, not by size; (iii) per-size MAE remains uniformly below 0.08 eV/atom across the entire range, with the largest residuals at the smallest nuclearities ( $N = 5-7$ ) where structural variability is largest.

## S2. Per-Model Cross-Validation Results

**Table S2.** Detailed cross-validation performance for all seven regressors trained on the full feature set. Standard 5-fold KFold cross-validation provides a within-domain stability estimate; size-grouped CV (4 size bins:  $N = 3-15$ ,  $16-30$ ,  $31-45$ ,  $46-55$ ; one bin held out per fold) tests near-extrapolation across nuclearity domains.

| Model            | Test MAE | Test R <sup>2</sup> | 5-fold CV MAE (mean) | 5-fold CV MAE (std) | Size-Grouped CV MAE |
|------------------|----------|---------------------|----------------------|---------------------|---------------------|
| LightGBM         | 0.01436  | 0.9957              | 0.01422              | 0.00044             | 0.107 ± 0.074       |
| ExtraTrees       | 0.01453  | 0.9948              | 0.01389              | 0.00027             | 0.079 ± 0.081       |
| CatBoost         | 0.01534  | 0.9947              | 0.01463              | 0.00039             | 0.079 ± 0.076       |
| RandomForest     | 0.01548  | 0.9940              | 0.01507              | 0.00030             | 0.092 ± 0.072       |
| GradientBoosting | 0.01550  | 0.9943              | 0.01400              | 0.00061             | 0.086 ± 0.071       |
| XGBoost          | 0.01597  | 0.9943              | 0.01457              | 0.00027             | 0.142 ± 0.071       |
| NeuralNet (MLP)  | 0.02908  | 0.9748              | 0.02550              | 0.00112             | 0.078 ± 0.069       |

**Notes:** (i) all CV values are in eV/atom; (ii) the 30× smaller fold-to-fold standard deviations relative to the model-to-model spread indicate that the test-set MAE is a faithful estimator of generalisation accuracy within the QCD chemical and size domain; (iii) size-grouped CV degrades substantially across all models, quantifying the cost of out-of-domain extrapolation.

### S3. Per-Metal Model Accuracy

**Table S3.** Test-set absolute and squared error metrics broken down by metal, using the LightGBM full-feature model. Metal-stratified errors are useful for assessing whether the model treats Cu, Ag, and Au with comparable fidelity.

| Metal | n samples | MAE (eV/atom) | RMSE (eV/atom) |
|-------|-----------|---------------|----------------|
| Ag    | 232       | 0.01167       | 0.01706        |
| Cu    | 192       | 0.01498       | 0.02463        |
| Au    | 234       | 0.01652       | 0.02770        |

The slightly larger Au error is consistent with the broader range of low-energy Au isomers and the stronger sensitivity of relativistic systems to fine geometric variation.

### S4. Full-Feature SHAP Importance Ranking

**Table S4.** Mean absolute SHAP value for each input feature of the LightGBM full-feature model, sorted in descending order. SHAP values were computed on a representative sample of the test set; columns reflect the average magnitude of each feature's contribution to the predicted DFT energy per atom (eV/atom).

| Rank | Feature                       | mean  SHAP  (eV/atom) | Category         |
|------|-------------------------------|-----------------------|------------------|
| 1    | metal_Z (atomic number)       | 0.27404               | Composition      |
| 2    | n_atoms (cluster size N)      | 0.15566               | Size             |
| 3    | compactness (Rg/d_mean)       | 0.00685               | Geometric        |
| 4    | homo_lumo_gap                 | 0.00389               | Electronic (DFT) |
| 5    | mean_dist (centroid distance) | 0.00311               | Geometric        |
| 6    | std_dist                      | 0.00277               | Geometric        |
| 7    | max_dist                      | 0.00262               | Geometric        |
| 8    | bbox_z                        | 0.00252               | Geometric        |
| 9    | asphericity                   | 0.00230               | Geometric        |
| 10   | radius_gyration               | 0.00216               | Geometric        |
| 11   | magnetic_moment               | 0.00207               | Electronic (DFT) |

|    |                 |         |                                                          |
|----|-----------------|---------|----------------------------------------------------------|
| 12 | bbox_y          | 0.00148 | Geometric                                                |
| 13 | bbox_x          | 0.00108 | Geometric                                                |
| 14 | n_val_electrons | ~0.0    | Composition (redundant with N for monometallic clusters) |

Two features dominate by two orders of magnitude over the others: metal identity ( $Z$ ) and cluster size ( $N$ ). Geometric and electronic descriptors enter at the  $\sim 10$  meV/atom scale and govern the small energy differences between isomers of the same size and metal that determine magic-number locations. Note: in this dataset  $n\_val\_electrons$  is exactly proportional to  $N$  for monoatomic Cu/Ag/Au clusters and therefore contributes negligibly when  $N$  is included.

### S5. Geometry-Only Model: Full Benchmarking

**Table S5.** Performance of all seven regressors trained on the geometry-only feature set (metal  $Z$ , cluster size  $N$ , and nine geometric descriptors, without DFT-derived electronic features). Same 70/15/15 stratified split as for the full-feature benchmark.

| Model            | MAE <sub>tes</sub><br>t | R <sup>2</sup> <sub>tes</sub><br>t | RMSE <sub>tes</sub><br>t | 5-fold CV<br>MAE     | Size-<br>Grouped CV<br>MAE | Train<br>(s) |
|------------------|-------------------------|------------------------------------|--------------------------|----------------------|----------------------------|--------------|
| LightGBM         | 0.01477                 | 0.9955                             | 0.0240                   | 0.01419 ±<br>0.00069 | 0.110 ±<br>0.080           | 0.7          |
| ExtraTrees       | 0.01513                 | 0.9943                             | 0.0271                   | 0.01414 ±<br>0.00040 | 0.082 ±<br>0.081           | 2.4          |
| RandomForest     | 0.01585                 | 0.9942                             | 0.0274                   | 0.01529 ±<br>0.00033 | 0.094 ±<br>0.073           | 10.2         |
| GradientBoosting | 0.01649                 | 0.9928                             | 0.0305                   | 0.01477 ±<br>0.00057 | 0.094 ±<br>0.075           | 20.8         |
| CatBoost         | 0.01652                 | 0.9938                             | 0.0283                   | 0.01539 ±<br>0.00038 | 0.087 ±<br>0.078           | 2.9          |
| XGBoost          | 0.01871                 | 0.9909                             | 0.0344                   | 0.01657 ±<br>0.00050 | 0.157 ±<br>0.073           | 1.5          |
| NeuralNet (MLP)  | 0.03209                 | 0.9694                             | 0.0628                   | 0.02851 ±<br>0.00090 | 0.082 ±<br>0.072           | 1.9          |

All metrics in eV/atom unless stated. Removing the two electronic features (HOMO–LUMO gap, magnetic moment) costs only  $\approx 0.4$ – $3.0$  meV/atom in MAE for the top three regressors, demonstrating that energies can be ranked accurately from coordinates alone within the QCD chemical and size domain.

## S6. Per-Metal Magic-Number Tables — Full $\Delta^2E$ Series

**Tables S6–S8.** Complete second-difference series  $\Delta^2E(N) = E(N+1) + E(N-1) - 2 E(N)$  for each coinage metal (Cu, Ag, Au), where  $E(N)$  is the average DFT energy per atom at size  $N$  within that metal. Adaptive thresholds: 0.0146, 0.0113, and 0.0112 eV/atom for Cu, Ag, and Au, respectively ( $= 0.5 \times \sigma(\Delta^2E)$ ). Sizes with  $\Delta^2E$  exceeding the threshold are highlighted in the “Detected” column. Literature values are taken from Häkkinen, de Heer, Knight, and Pyykkö (see main text).

**Table S6.** *Copper (Cu) —  $\Delta^2E$  series and detected magic numbers*

| N  | Avg E_DFT/N (eV/atom) | $\Delta^2E$ (eV/atom) | Detected? | Notes                               |
|----|-----------------------|-----------------------|-----------|-------------------------------------|
| 5  | -1.5934               | —                     | —         |                                     |
| 6  | -1.9764               | -0.058                | No        | Literature magic; not detected here |
| 7  | -2.1218               | +0.005                | No        |                                     |
| 8  | -2.2515               | +0.048                | Yes       | Both (jellium $1S^21P^6$ )          |
| 10 | -2.3621               | +0.034                | Yes       | Detected only                       |
| 12 | -2.5074               | +0.030                | Yes       | Detected only                       |
| 14 | -2.6238               | +0.025                | Yes       | Detected only                       |
| 18 | -2.6843               | +0.001                | No        | Literature magic; sub-threshold     |
| 20 | -2.7308               | +0.018                | Yes       | Both                                |
| 24 | -2.8094               | +0.022                | Yes       | Detected only                       |
| 34 | -2.8971               | +0.034                | Yes       | Both                                |
| 37 | -2.9189               | +0.020                | Yes       | Detected only                       |
| 40 | -2.9437               | +0.003                | No        | Literature magic; sub-threshold     |
| 55 | -3.0124               | —                     | —         |                                     |

**Table S7.** Silver (Ag) —  $\Delta^2E$  series and detected magic numbers

| <b>N</b> | <b>Avg E_DFT/N<br/>(eV/atom)</b> | <b><math>\Delta^2E</math><br/>(eV/atom)</b> | <b>Detected<br/>?</b> | <b>Notes</b>                         |
|----------|----------------------------------|---------------------------------------------|-----------------------|--------------------------------------|
| 5        | -1.2890                          | —                                           | —                     |                                      |
| 6        | -1.4670                          | +0.039                                      | Yes                   | Both (only metal where N=6 detected) |
| 8        | -1.6873                          | +0.110                                      | Yes                   | Both (strongest peak)                |
| 10       | -1.7964                          | +0.038                                      | Yes                   | Detected only                        |
| 12       | -1.8612                          | +0.024                                      | Yes                   | Detected only                        |
| 18       | -1.9607                          | +0.006                                      | No                    | Literature magic; sub-threshold      |
| 20       | -2.0032                          | +0.030                                      | Yes                   | Both                                 |
| 24       | -2.0588                          | +0.018                                      | Yes                   | Detected only                        |
| 26       | -2.0712                          | +0.015                                      | Yes                   | Detected only                        |
| 32       | -2.0987                          | +0.014                                      | Yes                   | Detected only                        |
| 34       | -2.1136                          | +0.030                                      | Yes                   | Both                                 |
| 37       | -2.1284                          | +0.014                                      | Yes                   | Detected only                        |
| 40       | -2.1444                          | +0.001                                      | No                    | Literature magic; sub-threshold      |
| 53       | -2.1887                          | +0.018                                      | Yes                   | Detected only                        |
| 55       | -2.1968                          | —                                           | —                     | Literature magic                     |

**Table S8.** Gold (Au) —  $\Delta^2E$  series and detected magic numbers

| <b>N</b> | <b>Avg E_DFT/N<br/>(eV/atom)</b> | <b><math>\Delta^2E</math><br/>(eV/atom)</b> | <b>Detected<br/>?</b> | <b>Notes</b>          |
|----------|----------------------------------|---------------------------------------------|-----------------------|-----------------------|
| 5        | -1.6789                          | —                                           | —                     |                       |
| 6        | -1.8796                          | +0.026                                      | Yes                   | Both                  |
| 7        | -1.9810                          | +0.014                                      | Yes                   | Detected only         |
| 8        | -2.0956                          | +0.091                                      | Yes                   | Both (strongest peak) |
| 10       | -2.2090                          | +0.018                                      | Yes                   | Detected only         |
| 12       | -2.2987                          | +0.034                                      | Yes                   | Detected only         |

|    |         |        |     |                                             |
|----|---------|--------|-----|---------------------------------------------|
| 14 | -2.3431 | +0.018 | Yes | Detected only                               |
| 16 | -2.3830 | +0.025 | Yes | Detected only                               |
| 18 | -2.4165 | +0.006 | No  | Literature magic; sub-threshold             |
| 19 | -2.4286 | +0.013 | Yes | Detected only                               |
| 20 | -2.4465 | -0.002 | No  | Literature magic; ANOMALOUS — see main text |
| 25 | -2.5078 | +0.022 | Yes | Detected only                               |
| 28 | -2.5448 | +0.015 | Yes | Detected only                               |
| 32 | -2.5844 | +0.018 | Yes | Both (Au-specific; relativistic)            |
| 34 | -2.5942 | +0.017 | Yes | Both                                        |
| 36 | -2.6082 | +0.018 | Yes | Detected only                               |
| 38 | -2.6327 | +0.016 | Yes | Both (Au-specific; relativistic)            |
| 53 | -2.6956 | +0.034 | Yes | Detected only                               |
| 55 | -2.7023 | —      | —   | Literature magic                            |

## S8. Reproducibility Checklist

The following measures support full reproducibility of all results reported in the revised manuscript:

1. Random seeds fixed at 42 for all NumPy, scikit-learn, XGBoost, LightGBM, and CatBoost components.
2. Stratified 70/15/15 train/validation/test split implemented in `three_way_split()`, preserving the per-metal proportions in each subset.
3. 5-fold KFold cross-validation (`shuffle=True`, `random_state=42`) for all seven models on the full and geometry-only feature sets.
4. Size-grouped cross-validation with four nuclearity bins (3–15, 16–30, 31–45, 46–55).
5. Standardisation (zero mean, unit variance) fitted on training data only and applied to validation/test.
6. Adaptive metal-specific magic-number threshold:  $\Delta^2E_{\min} = 0.5 \times \sigma(\Delta^2E_{\text{metal}})$ .
7. All model hyperparameters listed explicitly in the open-source script.

8. Complete pipeline (Python + Jupyter notebook), trained models, processed dataset, all figures, and all tables openly available at <https://github.com/alikhairbek/CoinageClusterML>.

9. Code release date: revision submission to PCCP, R1.

### Software Versions

| <b>Library</b> | <b>Version</b> |
|----------------|----------------|
| Python         | 3.12           |
| NumPy          | 1.26           |
| pandas         | 2.2            |
| scikit-learn   | 1.4            |
| XGBoost        | 2.0            |
| LightGBM       | 4.3            |
| CatBoost       | 1.2            |
| SHAP           | 0.45           |
| matplotlib     | 3.8            |
| seaborn        | 0.13           |

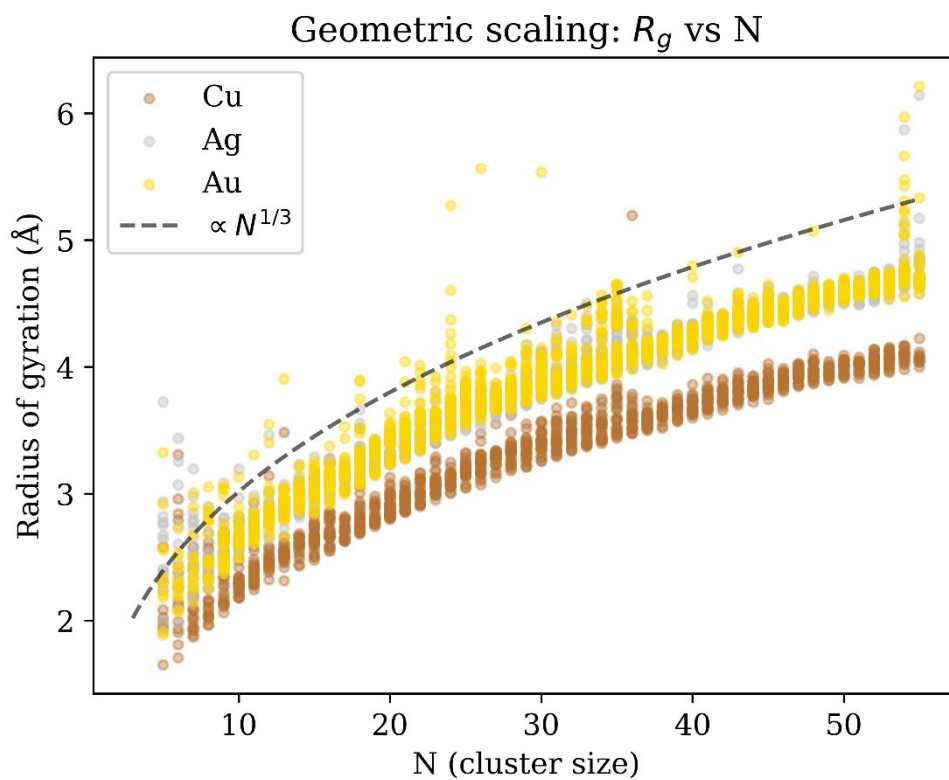

**Figure S1.** Radius of gyration vs cluster size (per metal)

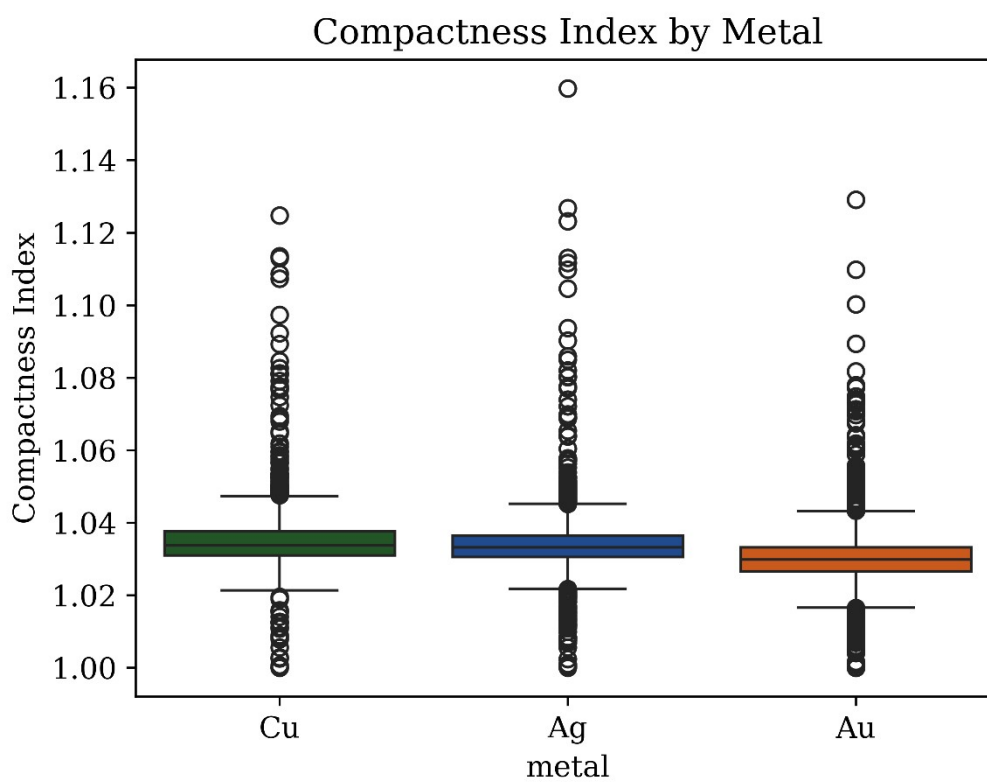

**Figure S2.** Compactness Index

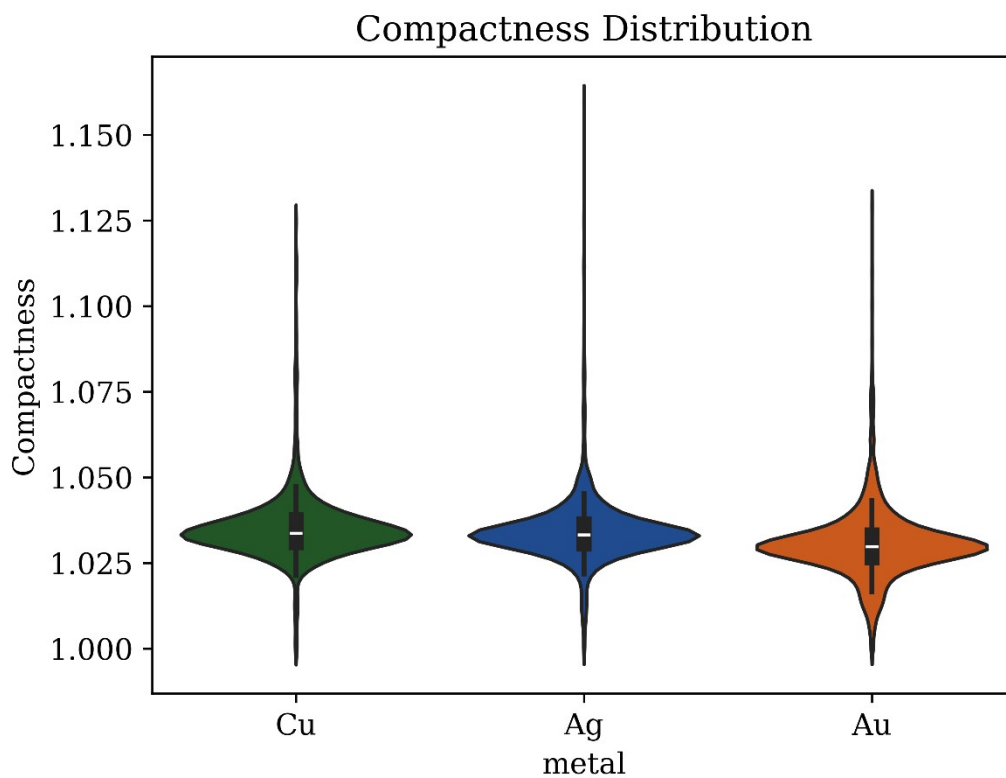

**Figure S3.** Compactness Distribution

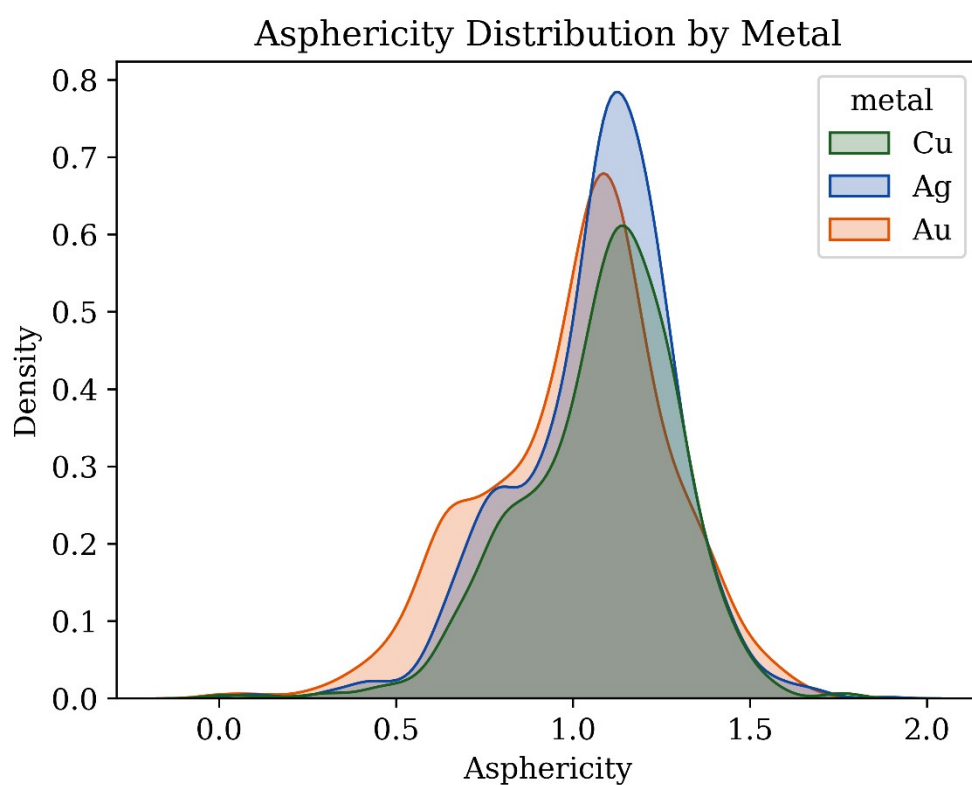

**Figure S4.** Asphericity Distribution By Metal

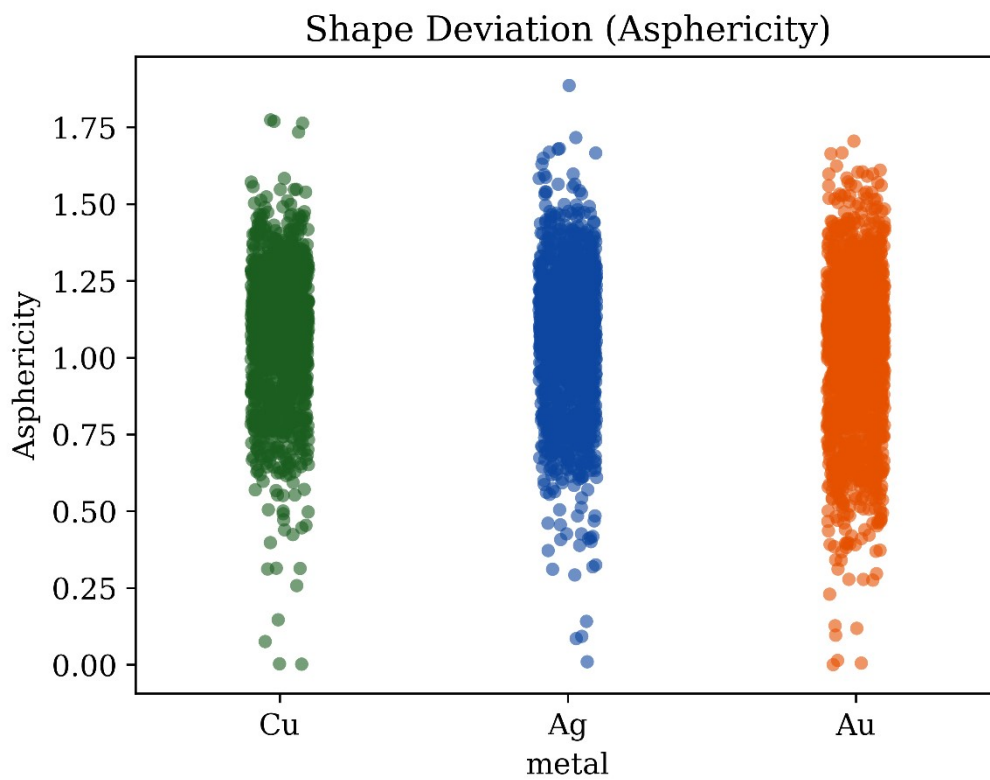

**Figure S5.** Shape Deviation (Asphericity)

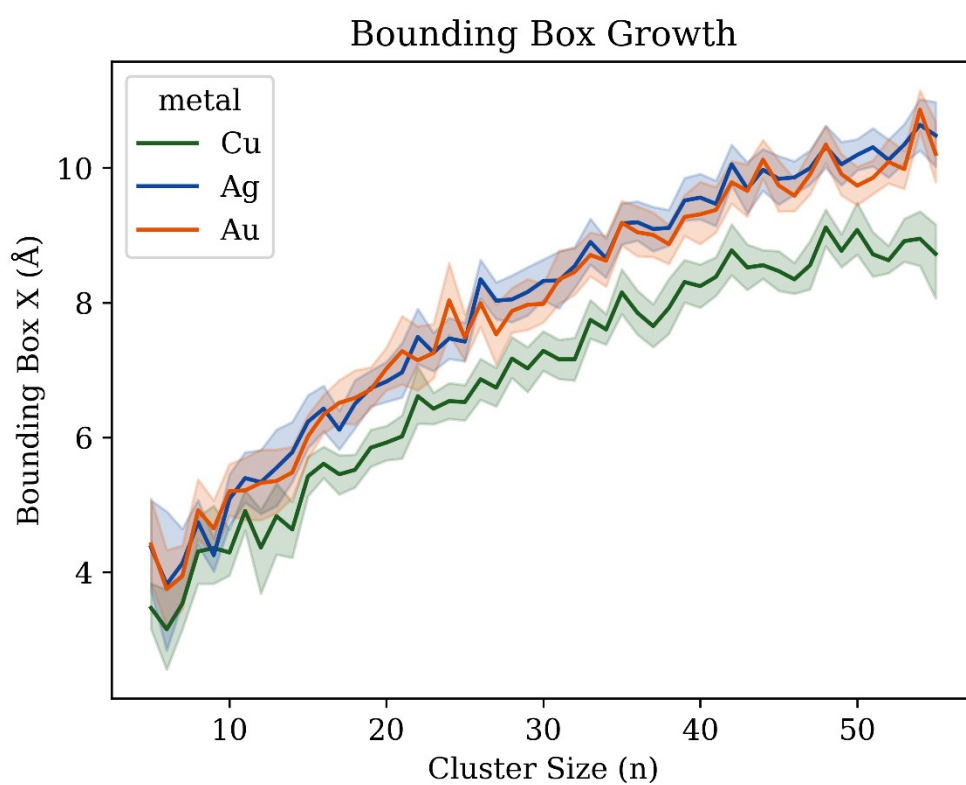

**Figure S6.** Bounding Box Growth

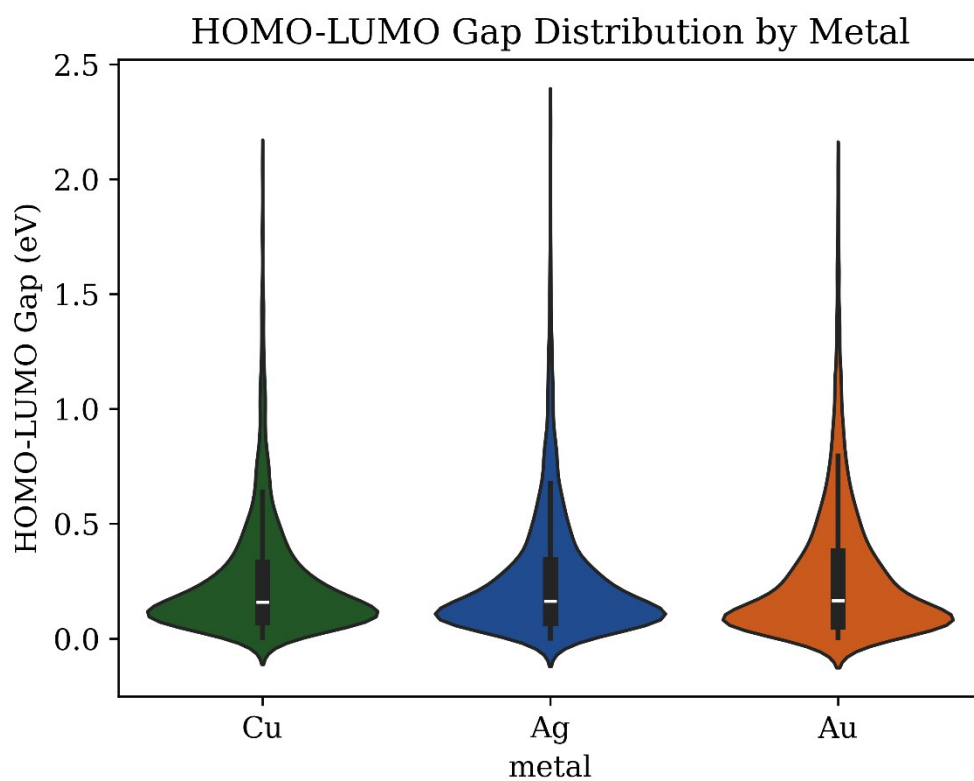

**Figure S7.** HOMO-LUMO Gap Distribution

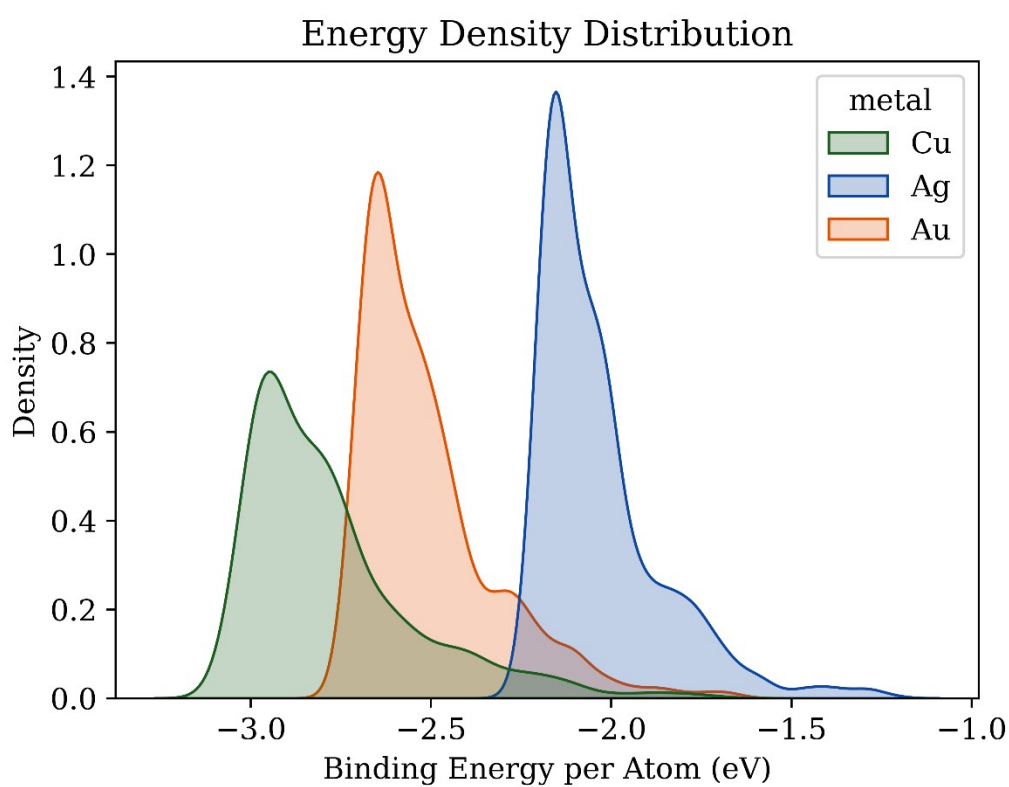

**Figure S8.** Energy Density Distribution

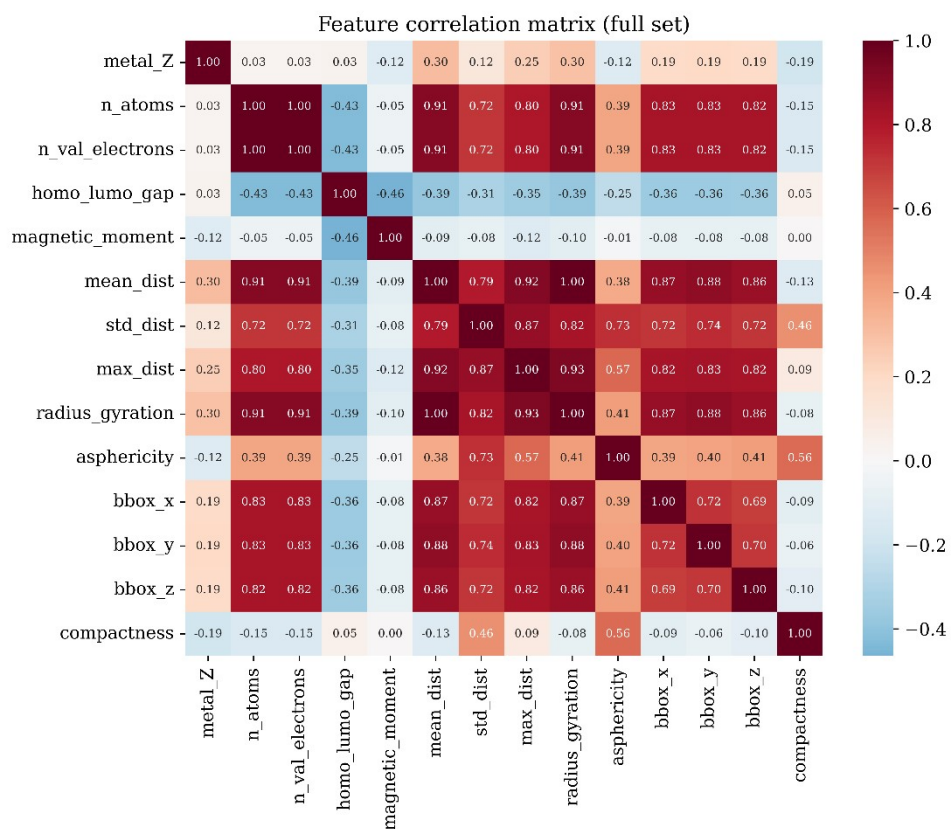

Figure S9. Full Correlation Matrix  
3D Stability Landscape

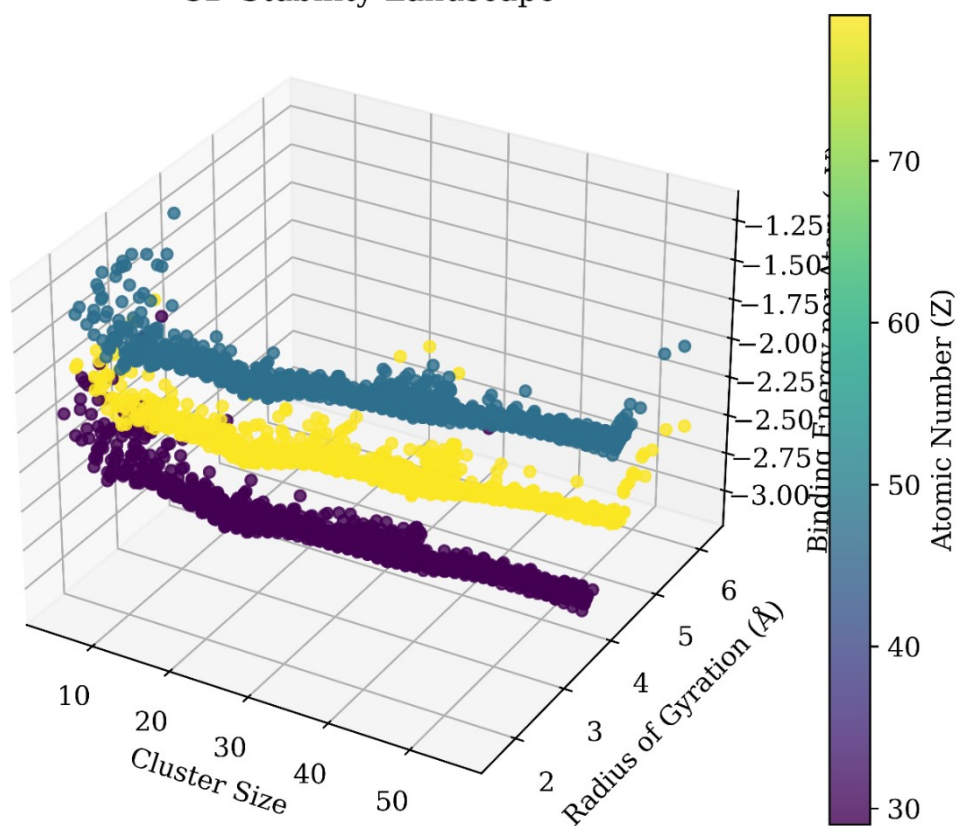

Figure S10. 3D Stability Landscape

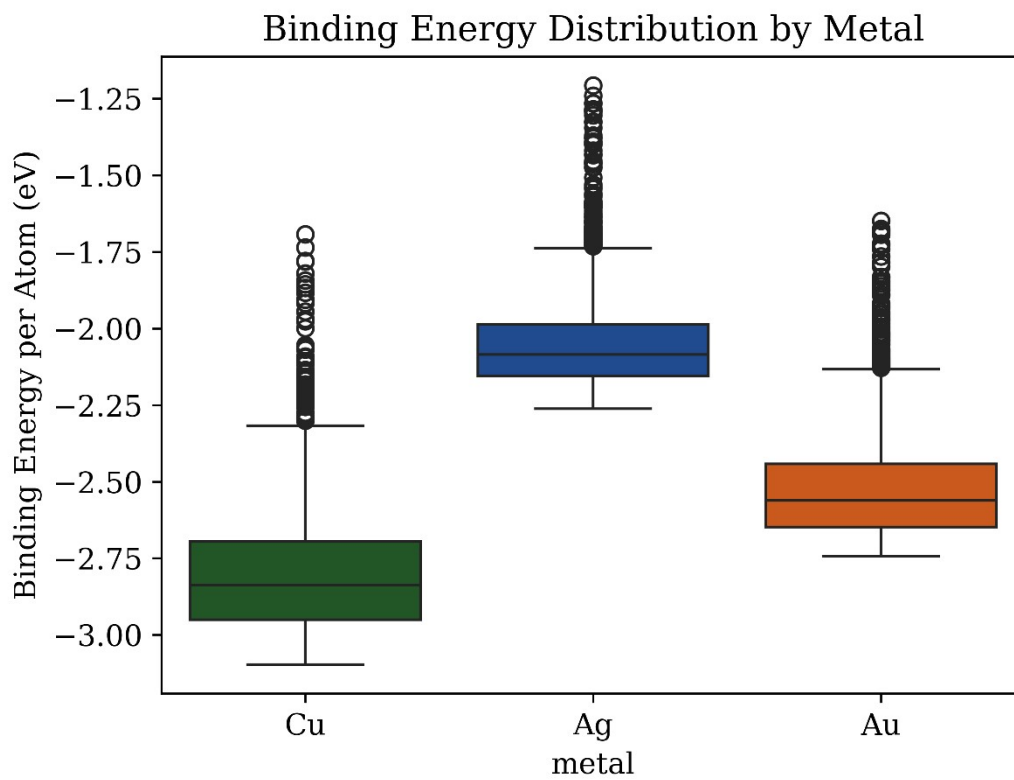

Figure S11. BE by Metal
